# Supplementary material for: Host-Microbe Multi-omic Profiling Identifies a Unique Program of COVID-19 Inflammatory Dysregulation in Solid Organ Transplant Recipients
Source: Research Square preprint supplement (doi:10.21203/rs.3.rs-3621844/v1), 2023-12-20
Supplement: Supplementary file 2 [file 83e7731bbfbea30f9953e953.xlsx]

## Sheet: Supp Data 2
ID	Description	setSize	NES	p.value	p.adjust	NES_vrld	p.adjust_vrld	core_enrichment	genes
R−HSA−909733	Interferon alpha/beta signaling	56	2.68224	1e-10	6.35333e-08	2.16024	0.000221085	3429/3434/2537/9636/91543/11274/10410/4599/3437/4938/8638/8519/4940/4939/3433/54739/3430/4600/10581/3665/3135/684	IFI27/IFIT1/IFI6/ISG15/RSAD2/USP18/IFITM3/MX1/IFIT3/OAS1/OASL/IFITM1/OAS3/OAS2/IFIT2/XAF1/IFI35/MX2/IFITM2/IRF7/HLA−G/BST2
R−HSA−913531	Interferon Signaling	173	2.05256	2.03301e-09	7.74984e-07	0	1	3429/3434/2537/9636/91543/11274/10410/7412/4599/3437/4938/8638/4502/8519/4940/4939/3433/54739/3430/51191/5610/4600/10581/3665/3135/117854/684/10346/3459/23586/85363/2209/24138/3127/3134/6737/9246/7706/3107/3106/9830/3663/10437/3840/10475/567/6672/3105/3660/5771	IFI27/IFIT1/IFI6/ISG15/RSAD2/USP18/IFITM3/VCAM1/MX1/IFIT3/OAS1/OASL/MT2A/IFITM1/OAS3/OAS2/IFIT2/XAF1/IFI35/HERC5/EIF2AK2/MX2/IFITM2/IRF7/HLA−G/TRIM6/BST2/TRIM22/IFNGR1/DDX58/TRIM5/FCGR1A/IFIT5/HLA−DRB5/HLA−F/TRIM21/UBE2L6/TRIM25/HLA−C/HLA−B/TRIM14/IRF5/IFI30/KPNA4/TRIM38/B2M/SP100/HLA−A/IRF2/PTPN2
R−HSA−1640170	Cell Cycle	638	-1.74013	1e-10	6.35333e-08	-1.56617	5.1331e-06	81929/114791/23122/25909/23141/9183/22822/1876/5433/3619/2010/23279/8317/4869/4927/9631/22995/54069/10926/9656/91782/5889/5933/29893/26003/1017/9918/151246/8355/85378/672/29781/23244/4957/5579/9793/23649/5983/64105/79980/55055/9232/23165/23354/10051/7283/54908/64682/5577/5425/4609/80321/28227/91687/1163/55835/1763/55920/10734/1029/22994/23225/10592/11200/64946/207/5985/3014/3306/23310/27229/5424/…	SEH1L/TUBGCP5/CLASP2/AHCTF1/ANKLE2/ZW10/PHLDA1/E2F6/POLR2D/INCENP/EMD/NUP160/CDC7/NPM1/NUP88/NUP155/CEP152/MIS18A/DBF4/MDC1/CHMP7/RAD51C/RBL1/PSMC3IP/GORASP2/CDK2/NCAPD2/SGO2/HIST1H3G/TUBGCP6/BRCA1/NCAPH2/PDS5A/ODF2/PRKCB/CKAP5/POLA2/RFC3/CENPK/DSN1/ZWILCH/PTTG1/NUP205/HAUS5/SMC4/TUBG1/SPDL1/ANAPC1/PRKAR2B/POLD2/MYC/CEP70/PPP2R3B/CENPL/CKS1B/CENPJ/DNA2/RCC2/STAG3/CDKN2A/CEP131/NUP210/SMC2/CHEK2/C…
R−HSA−198933	Immunoregulatory interactions between a Lymphoid and a non−Lymphoid cell	110	1.92452	4.09721e-06	0.000354967	1.91518	0.000251398	114132/6614/7412/3904/3805/1308/8519/89858/11126/2214/3135/3824/10870/7305/10871/126014/353514/6441/10859/3903/2209/945/3134/27180/22914/56253/926/9976/9437/29992/11027/11314/3107/342510/3106/10219/146722/910/27036/567/3105/89790/912/909/3820/925/4277/51348/915/120425	SIGLEC11/SIGLEC1/VCAM1/LAIR2/KIR2DL4/COL17A1/IFITM1/SIGLEC12/CD160/FCGR3A/HLA−G/KLRD1/HCST/TYROBP/CD300C/OSCAR/LILRA5/SFTPD/LILRB1/LAIR1/FCGR1A/CD33/HLA−F/SIGLEC9/KLRK1/CRTAM/CD8B/CLEC2B/NCR1/PILRA/LILRA2/CD300A/HLA−C/CD300E/HLA−B/KLRG1/CD300LF/CD1B/SIGLEC7/B2M/HLA−A/SIGLEC10/CD1D/CD1A/KLRB1/CD8A/MICB/KLRF1/CD3D/JAML
R−HSA−166663	Initial triggering of complement	11	2.12975	2.00024e-05	0.00146633	2.16887	0.00195465	712/713/1675/714/5199/717	C1QA/C1QB/CFD/C1QC/CFP/C2
R−HSA−69190	DNA strand elongation	32	-2.0685	1.65119e-06	0.000174843	-2.00932	0.000532474	23649/5983/5425/1763/5985/5424/5111/5422/4174/64785/4172/3978/5984/2237/4175/84296/4176/9837/4173/8318/51659/4171	POLA2/RFC3/POLD2/DNA2/RFC5/POLD1/PCNA/POLA1/MCM5/GINS3/MCM3/LIG1/RFC4/FEN1/MCM6/GINS4/MCM7/GINS1/MCM4/CDC45/GINS2/MCM2
R−HSA−198933	Immunoregulatory interactions between a Lymphoid and a non−Lymphoid cell	110	1.92452	4.09721e-06	0.000354967	1.91518	0.000251398	114132/6614/7412/3904/3805/1308/8519/89858/11126/2214/3135/3824/10870/7305/10871/126014/353514/6441/10859/3903/2209/945/3134/27180/22914/56253/926/9976/9437/29992/11027/11314/3107/342510/3106/10219/146722/910/27036/567/3105/89790/912/909/3820/925/4277/51348/915/120425	SIGLEC11/SIGLEC1/VCAM1/LAIR2/KIR2DL4/COL17A1/IFITM1/SIGLEC12/CD160/FCGR3A/HLA−G/KLRD1/HCST/TYROBP/CD300C/OSCAR/LILRA5/SFTPD/LILRB1/LAIR1/FCGR1A/CD33/HLA−F/SIGLEC9/KLRK1/CRTAM/CD8B/CLEC2B/NCR1/PILRA/LILRA2/CD300A/HLA−C/CD300E/HLA−B/KLRG1/CD300LF/CD1B/SIGLEC7/B2M/HLA−A/SIGLEC10/CD1D/CD1A/KLRB1/CD8A/MICB/KLRF1/CD3D/JAML
R−HSA−69306	DNA Replication	127	-1.83169	6.32092e-06	0.000523812	-1.64453	0.00780394	64682/5425/1763/5985/5424/5111/5422/5426/51053/4174/9134/64785/4172/3978/5984/2237/4175/11065/23594/84296/5427/1869/4176/890/143471/9837/4173/81620/4998/898/8318/51659/4171/55388/990	ANAPC1/POLD2/DNA2/RFC5/POLD1/PCNA/POLA1/POLE/GMNN/MCM5/CCNE2/GINS3/MCM3/LIG1/RFC4/FEN1/MCM6/UBE2C/ORC6/GINS4/POLE2/E2F1/MCM7/CCNA2/PSMA8/GINS1/MCM4/CDT1/ORC1/CCNE1/CDC45/GINS2/MCM2/MCM10/CDC6
R−HSA−1236975	Antigen processing−Cross presentation	95	1.772	0.000169823	0.00809209	2.02009	0.000192519	1514/23643/3135/10333/4360/2209/3134/7099/3107/8673/3106/1535/7097/7096/4615/4688/5710/567/9341/7979/5691/5698/3105/1536/1520/4689/5688/5699/5696/7311/929/5720/3133/5693/5685/6810/5689/4012/9491	CTSL/LY96/HLA−G/TLR6/MRC1/FCGR1A/HLA−F/TLR4/HLA−C/VAMP8/HLA−B/CYBA/TLR2/TLR1/MYD88/NCF2/PSMD4/B2M/VAMP3/SEM1/PSMB3/PSMB9/HLA−A/CYBB/CTSS/NCF4/PSMA7/PSMB10/PSMB8/UBA52/CD14/PSME1/HLA−E/PSMB5/PSMA4/STX4/PSMB1/LNPEP/PSMF1
R−HSA−173623	Classical antibody−mediated complement activation	4	1.83162	0.00032997	0.0123318	1.80291	0.0171298	712/713/714	C1QA/C1QB/C1QC
R−HSA−446652	Interleukin−1 family signaling	123	1.6127	0.00038753	0.0142045	1.69443	0.00316972	7850/5608/8809/5784/8807/3606/6283/177/834/9978/11213/54472/4615/1511/5710/1326/7979/5691/5698/5771/240/5688/5777/28511/5699/5696/7311/3556/5720/51135/5693/5685/10068/5689/5782/9491/3554/6500/5692/59307/5713/5706	IL1R2/MAP2K6/IL18R1/PTPN14/IL18RAP/IL18/S100A12/AGER/CASP1/RBX1/IRAK3/TOLLIP/MYD88/CTSG/PSMD4/MAP3K8/SEM1/PSMB3/PSMB9/PTPN2/ALOX5/PSMA7/PTPN6/NKIRAS2/PSMB10/PSMB8/UBA52/IL1RAP/PSME1/IRAK4/PSMB5/PSMA4/IL18BP/PSMB1/PTPN12/PSMF1/IL1R1/SKP1/PSMB4/SIGIRR/PSMD7/PSMC6
R−HSA−1169410	Antiviral mechanism by IFN−stimulated genes	79	1.63771	0.00159326	0.0394385	0	1	3434/9636/11274/4599/4938/8638/4940/4939/51191/5610/4600	IFIT1/ISG15/USP18/MX1/OAS1/OASL/OAS3/OAS2/HERC5/EIF2AK2/MX2
R−HSA−983695	Antigen activates B Cell Receptor (BCR) leading to generation of second messengers	32	-1.71393	0.00260261	0.0590518	0	1	974/3710/7220/933/640/973/29760/930	CD79B/ITPR3/TRPC1/CD22/BLK/CD79A/BLNK/CD19
R−HSA−611105	Respiratory electron transport	100	2.10487	1.94894e-07	3.64806e-05	2.87414	6.79286e-09	1351/4537/4696/4713/6392/4694/4535/1329/10975/4707/1340/4724/4715/4709/55967/1337/4536/4725/84987/29796/51103/1349/4711/4541/4697/51079/4716/55863/4695/4731/51300/7381/1345/1350/1327/4726/2109/4717/6390/9167/126328/4710/91942/4718/6834/4708/4702	COX8A/MT−ND3/NDUFA3/NDUFB7/SDHD/NDUFA1/MT−ND1/COX5B/UQCR11/NDUFB1/COX6B1/NDUFS4/NDUFB9/NDUFB3/NDUFA12/COX6A1/MT−ND2/NDUFS5/COX14/UQCR10/NDUFAF1/COX7B/NDUFB5/MT−ND6/NDUFA4/NDUFA13/NDUFB10/TMEM126B/NDUFA2/NDUFV3/TIMMDC1/UQCRB/COX6C/COX7C/COX4I1/NDUFS6/ETFB/NDUFC1/SDHB/COX7A2L/NDUFA11/NDUFB4/NDUFAF2/NDUFC2/SURF1/NDUFB2/NDUFA8
